# Supplementary material for: Perenniality, more than genotypes, shapes biological and chemical rhizosphere composition of perennial wheat lines
Source: Front Plant Sci. 2023 May 8;14:1172857. doi: 10.3389/fpls.2023.1172857 (PMC10200949; doi:10.3389/fpls.2023.1172857)
Supplement: Supplementary file 6 [file Table_6.xlsx]

## Sheet: GC-MS
Metabolites identified in a silty clay loam soil from Montelibretti, Rome, IT under 4 different perennial wheat lines (235A, OK72, 11955, 280B), Thynopirum intermedium (Tpi), Triticum durum (Ardente), and bare soil as control. Compounds were identified based on spectral information provided by NIST 14 GC-MS library and confirmed with retention times and mass spectra of authentic standards. Putati…
Compound	RT (min)	PubChem ID	Chemical Formula	Biological Class	Main Sugar origin	Relative percentage
						235A_4				OK72_4				11955_4				280B_4				Tpi_11			235A_1				11955_1				OK72_1				280B_1				Ardente_1				Bare_soil
benzoic acid	5.86	243	C₇H₆O₂	benze-carboxylic acid		0.492236	1.8669	1.21203	1.57498	0.111859	0.267072	0.865542	0.398814	0.148066	0.637086	0.51179	0.252043	1.0257	0.702162	1.16999	0.0924941	0.662491	1.25016	0.342294	3.20343	0.170962	0.532375	3.26344	0.925537	0.175223	0.858388	2.24011	1.30461	0.0954569	1.52627	1.54308	0.598412	1.31523	1.38417	0.319767	1.59714	0.706076	0.53598	0.862475	0.728527	0.685673	1.09765
glycerol	6.02	753	C₃H₈O₃	polyalcohol		1.74263	2.00539	3.12629	2.92306	4.53138	1.01275	0.910048	1.05556	3.3354	1.64359	2.67553	1.05166	2.5274	1.63947	2.78883	0.13296	2.86568	2.3708	0.742068	4.36999	1.50603	3.30605	5.18776	53.3806	0.997993	0.980276	1.94775	1.62897	1.62851	4.68121	1.71772	1.31154	1.91401	3.65995	1.5138	2.25795	9.93388	0.947673	22.8	1.7399	44.4678	2.37285
C9:0 (pelargonic acid)	6.85	8158	C₉H₁₈O₂	fatty acid		0.355611	0.0949606	0.220254	0	0.101571	0	0	0	0	0.0593481	0.108285	0.0499095	0.182385	0.0448263	0	0.0763107	0.172241	0	0	0.279367	0	0.171969	0	0	0	0.113379	0.383735	0.32671	0	0.459823	0	0.456176	0.462676	0	0.120712	1.70841	0.145005	0.169769	0.499298	0.62889	0.581553	0.349345
dodecanediol	7.16	181638	C12H26O₂	polyalcohol		0.148609	0.394321	0.235191	0.462404	0.0736486	0.107817	0.215207	0.183386	0.205287	0.129061	0.20772	0.0634849	0.432074	0.117559	0.371563	0.159579	0.175211	0.130169	0.0469037	0.822929	0.298028	0.251281	0.385557	0.192141	0.108103	0.143091	0	0.273618	0.0666071	0.527079	0.25582	0.359816	0	0.0919512	0.200269	0.380799	0.183788	0.535059	0.140863	0.394906	0.256352	0.274244
pentose	7.23		C₅H₁₀O₅	monosaccharide		0.269251	0.477071	0.354042	0.778886	0.159911	0.172725	0.248895	0.197033	0.547758	0.26959	0.363542	0.237616	0.565484	0.262417	0.415259	0.273692	0.32184	0.212686	0.147405	1.40356	0.50403	0.381289	0.649576	0.398148	0.144343	0.35296	0	0.313723	0.194793	0.476908	0.545893	0.302701	0	0.215809	0.430763	0.854683	0.40119	0.659294	0.473886	0.620968	0.670857	0.741197
C14	8.89			alkane		0.161728	0.187712	0.176723	0.164593	0.109458	0.135795	0.192458	0.133202	0.142442	0.109625	0.133689	0.117069	0.201777	0.170851	0.250806	0.128157	0.130935	0.169937	0.0916073	0.460798	0.330207	0.207237	0	0.258225	0.0725752	0.147428	0.306657	0.189018	0.0967068	0.351262	0.0957221	0.174935	0.081479	0.102905	0.182659	0.221273	0.344212	0.268717	0.22028	0.286518	0.194083	0.384413
(α) arabinose	8.92	439195	C₅H₁₀O₅	monosaccharide	Plants and to a lesser degree bacterial cells	0.0890079	0.123214	0.14076	0.173605	0.096812	0.109017	0.171482	0	0.0518983	0.121149	0.290884	0.0898255	0.261764	0.0755027	0.224463	0	0.155579	0.109879	0.0712795	0.343852	0.0428092	0.133251	0	0.102071	0	0.0572495	0	0.21758	0.0434773	0	0.063544	0.23129	0.118673	0.0513913	0.152303	0	0.156369	0.105098	0	0.229668	0.138909	0.166782
(β) arabinose	9.15	439196	C₅H₁₀O₅	monosaccharide	Plants and to a lesser degree bacterial cells	0.0776489	0.240849	0.24791	0.201256	0.126092	0.10142	0.143395	0.139862	0.125529	0.17185	0.297948	0.135864	0.222853	0.140638	0.227568	0	0	0.117543	0.101785	0.283713	0.0735543	0.206256	0.126047	0.32749	0.038045	0.171158	0.11272	0.263634	0.0942545	0.275232	0.127712	0	0.0778109	0.100334	0.207004	0.150556	0.214936	0.174707	0	0	0	0.197181
succinic acid	9.55	1110	C₄H₆O₄	dicarboxylic acid		0.173488	0.227426	0.21015	0.385775	0.173425	0.129968	0.145313	0.231219	0.348559	0.140341	0.314903	0.111473	0.427357	0.162435	0.384993	0.194743	0.533808	0.22774	0.12912	0.0892657	0.279392	0.267567	0.516489	0.146749	0.109555	0.19689	0.387981	0.302809	0.126233	0.321974	0.167716	0.206471	0.275754	0.132764	0.260835	0.286089	0.392983	0.149036	0.625379	0.166443	0.0755781	0.243451
xylitol/ ribitol	9.7	827/ 6912	C5H12O5	pentose alcohol	Reduction of xylose (plants) and ribose (bacterial cells)	0.0612347	0.119018	0.102717	0	4.73567	0.128975	0.0856972	0.0538108	0.36194	0.106843	0.0633434	0.140037	0.162725	0.0417488	0.202232	0.0199005	0	0.0703501	0.0971652	0.193962	0.0353992	0	0.151954	0	0.0319766	0.0596424	0.0837183	0.486132	0.0956891	0	0	0	0.0505499	0.235222	0	0.170827	0.165333	0.0738125	0	0	0	0.106428
2,6 - diisopropylnaphthalene	9.83	32241	C₁₆H₂₀	other		0	0	0	0	0.0608108	0	0	0	1.0081	0	0.258755	0	0.129301	0.00804398	0.0870032	0	0	0	0.0185877	0	0.044672	0.0954844	0.165508	0	0	0	0	0.294025	0.0201219	0.604579	0	0.244969	0	0	0.0682871	0	0	0	0	0.263823	0	0.528568
1,3 - diisopropylnaphthalene	9.89	92672	C₁₆H₂₀	other		0	0	0	0	0.127648	0	0	0	0.0907368	0	0.23666	0	0.195951	0.0342636	0	0	0	0	0.0169253	0	0	0	0.149857	0	0	0	0.0718704	0	0	0	0	0	0	0	0	0	0	0	0	0	0	0
1,7 - diisopropylnaphthalene	9.92	3023652	C₁₆H₂₀	other		0.0387205	0	0	0	0.161476	0.209141	0	0.066072	0.0780544	0.109971	0.222374	0.129944	0.187656	0.0638497	0.17011	0	0	0	0	0	0	0	0.171886	0	0	0.0370984	0	0.326875	0.111242	0	0	0	0	0.0348873	0	0	0	0	0	0	0	0
pentofuranose	10.02	993	C₅H₁₀O₅	monosaccharide		0.131606	0	0	0	0	0.410107	0	0	0	0.345102	0.81195	0.320532	0.352481	0.320934	0	0	0.251354	0.104606	0.944657	0	0.155472	0.379469	0	0	0	0	0	0	0.174828	0	0	0.129512	0	0	0	0	0	0	0	0.0545976	0	0
uridine	10.12	6029	C₉H₁₂N₂O₆	nucleoside		0.165293	0.43451	0.45947	0.162514	0.360199	0.611399	0.284213	0.373547	0.0953238	0.316727	0.64126	0.303138	0.265332	0.310055	0	0	0.334536	0.115112	0.693897	0.397164	0	0	0.131622	0	0.0380753	0.124496	0.0878011	0.692367	0.444707	0.251498	0	0.553318	0.136073	0	0.166948	0	0.196132	0.138235	0.674742	0	0	0
fructose	10.41	5984	C6H12O6	monosaccharide	Bacteria cells	3.16653	9.56905	8.47856	2.3667	10.1654	13.0858	7.24435	5.6097	3.84892	7.89844	14.9369	10.2708	6.43943	7.58769	5.8972	0	3.51928	0	13.9367	7.56212	1.06357	1.82384	2.85015	3.06597	2.06225	3.17801	3.06323	13.8396	13.6544	6.07747	1.99107	4.23384	7.14491	3.76412	9.77145	2.29365	6.07467	2.1891	10.9915	0.549197	0	0
(α) glucose	10.94	5793	C6H12O6	monosaccharide	Fungal hyphae, bacterial cells and plants	1.13467	2.44514	2.57496	1.70878	3.27676	2.29899	2.00635	1.5099	1.68209	3.11196	3.50126	2.12203	1.72595	3.02791	2.69528	0	2.73951	2.17114	3.92704	1.91479	0.816715	3.81684	0.479059	0.786773	0.935547	1.1845	1.92298	3.38918	2.57108	1.77433	1.629	0.84239	1.03309	2.02505	2.38909	0.565624	1.82029	1.09669	4.27367	0.59747	0	1.83496
(β) mannose	11	18950	C6H12O6	monosaccharide	Extracellular polysaccharides of bacteria and plants	0.0790213	0.15299	0	0.248142	0.228997	0.139608	0.212507	0.20661	0.112126	0.1642	0.420749	0.157379	0.129589	0.217364	0.104866	0	0	0.263819	0.168978	0	0	0	0.122888	0.16826	0	0.0896594	0.134133	0.185251	0.169729	0	0.226499	0	0	0.0989998	0	0	0.0947689	0	0.151212	0	0	0
mannitol	11.17	6251	C6H14O6	hexose alcohol		0.97892	0.903441	1.05201	0.911167	6.76513	2.37389	1.19471	2.83733	3.03707	2.51637	4.00058	4.00905	0.900941	2.45657	1.40804	0.0888003	6.28937	7.44836	5.34474	0.485252	0.30779	0.622987	0.438258	0.219317	0.822446	0.439995	0.590844	0.34276	1.03026	0.531369	0.357539	0.271824	0.405024	1.20094	0.462139	0.256549	0.811486	0.307894	0.314748	0.755386	0	1.51358
aldohexose	11.35		C6H12O6	monosaccharide	Plants and microorganisms	0.291607	0.411415	0.378278	0.290134	0.20257	0.233206	0.32809	0.427184	0.141955	0.449533	0.497324	0.245693	0.361895	0.521269	0.310489	0	0.331803	0.403932	0.361	0.780967	0.186576	0.60263	0.313005	0.181451	0	0.179973	0.325358	0.204379	0.247381	0.253547	0.292863	0	0.286762	0.140794	0.345962	0.207457	0.595315	0.2621	0	0.176702	0	0.250413
(β) glucose	11.5	5793	C6H12O6	monosaccharide	Fungal hyphae, bacterial cells and plants	1.70765	3.66963	3.45067	1.73957	5.926	3.57501	3.12179	1.90111	2.28127	4.39682	5.5246	3.62858	2.49174	4.68439	3.35437	0.363257	3.95441	2.66597	5.82852	2.33604	0.644919	2.20031	0.740846	0.918522	0.59394	2.33855	2.21409	5.1269	4.1256	1.99488	1.76872	3.99727	1.70141	2.53518	3.17541	1.0791	2.02429	1.2001	3.94039	0.922171	3.20628	4.48912
C16:0 (palmitic acid)	11.99	985	C16H32O2	fatty acid		0.273814	0.218926	0	0	4.67693	0.0885122	0	0	0.0375753	0.210446	1.13789	0.0623522	0.489169	0.85764	0	0	0.53772	0	0	0	0	0	0.700482	0	0	0	0	1.23269	0.585353	0	0	7.46021	0.53037	0	0.939772	0.253685	1.19944	0.912306	1.58826	0.625249	9.78972	3.16387
myo-inositol	12.22	892	C6H12O6	6-carbon cyclic polyalcohol		0.881534	0.713826	0.865241	0.512357	1.08989	0.874934	0.526168	0.464327	0.709914	0.503182	1.33659	0.67934	0.906945	0.824811	0.518752	0.369018	0.752001	0.989333	0.531398	1.02048	0.683067	0.708589	0.824074	0.30042	0.73864	0.928031	0.476103	0.584999	0.365691	0.450598	0.559162	0.451028	0.716563	0.524822	0.394775	0.505593	0.75648	0.713353	0.376216	0.516726	0.754828	3.67784
C18:0 (stearic acid)	13.11	5281	C₁₈H₃₆O₂	fatty acid		1.28984	1.17192	1.15344	1.21701	1.59759	0.611692	0.637252	0.453305	0	1.48979	1.99842	0.578655	1.60409	0	0.902591	0.553854	0	1.0967	0	1.9872	2.35839	2.34466	1.4093	0.833306	0	1.21774	0.646047	1.74398	0.980914	2.37902	1.25089	1.84627	2.23382	0.531303	1.69351	1.331	3.26421	0	1.02693	0.611227	6.98948	0
not identified disaccharide	15.14		C12H22O11	disaccharide		2.58147	2.19226	2.17926	1.94151	0.977136	1.56316	1.92747	1.29878	2.21271	2.10527	2.36436	1.35132	2.38215	2.56857	1.74984	2.03367	2.25575	2.67336	1.41501	3.11722	3.32894	1.76275	2.20519	1.45911	2.58547	1.45486	2.40535	2.27857	1.719	2.16221	1.30042	2.32621	2.66578	1.13733	2.02806	2.47049	3.82355	2.24805	0.81327	2.47492	0.984654	1.31301
sucrose	15.24	7027	C6H10O6	disaccharide		2.51773	5.94216	3.25752	2.635	3.3189	4.15354	4.56845	2.73234	3.35942	8.26482	5.20901	3.06976	2.60014	7.64708	5.2379	2.70726	3.44084	2.4316	5.00823	1.1802	0.625742	0.634011	0.622276	1.12409	0.741899	0.717654	1.6436	5.18124	4.34263	1.7071	0.705561	1.00241	0.979419	0.464652	1.57089	1.36321	4.27395	1.38109	4.39672	0.469517	0.624106	3.41505
(α) maltose	15.44	6255	C12H22O11	disaccharide		0	0.289911	0.460384	0.447733	0.283252	0.288331	0.667004	0.360727	0.255139	0.5744	0.604561	0.482015	0.525501	0.981663	0.268502	0.384642	0.730168	0.859191	0.570897	0.297869	0.196048	0	0	0	0	0	0	0	0	0	0	0	0	0	0	0	0	0	0	0	0	0.296687
not identified disaccharide	15.6		C12H22O11	disaccharide		0.360134	0.731976	0.483167	0.602882	0.262523	0.240755	0.364666	0.489955	0.411908	0.589544	0.670237	0.393281	0.660917	0.498677	0.459495	0.640319	0.135283	0.477497	0.106688	0.475275	0.550469	0.67832	0.0967664	0	0	0.415192	0.199193	0	0	0.205254	0.196461	0	0.268399	0	0.154412	0.418824	0	0.17118	0.0930433	0.264572	0.0925484	0.316561
(β) maltose	15.67	6255	C12H22O11	disaccharide		0.249295	0.388615	0.583451	0.541814	0.496917	0.402436	0.512884	0.546147	0.632002	0.731649	0.789979	0.550187	0.848063	1.11505	0.45645	0.469117	1.01349	1.13383	0.836789	0.56106	0	0	0.176811	0	0.0560707	0.307763	0.247188	0.364681	0	0.49002	0.18272	0	0.223585	0	0.208744	0.519426	0	0	0.111278	0.436447	0	0.584947
trehalose	15.84	7427	C12H22O11	disaccharide	Microbial osmolytes	74.5372	59.9541	63.8893	73.8589	46.7195	61.5584	67.6141	74.513	67.9819	58.4962	43.2137	66.1011	63.3124	54.5574	66.17	86.8884	62.0173	67.3243	52.8606	61.0113	77.5398	74.3748	72.7915	31.9193	85.5538	82.0009	76.083	54.1539	62.1429	67.1384	81.5957	68.3027	73.3032	79.3378	69.1174	74.8903	55.3804	80.7425	39.6881	82.5145	27.2173	71.2526
not identified disaccharide	16.69		C12H22O11	disaccharide		4.15127	2.53769	2.36353	2.33545	1.26555	2.31329	3.27181	2.0415	2.90464	2.132	3.03048	1.55788	2.95329	3.16506	1.87967	2.48032	3.94234	3.44494	2.14731	2.34056	4.44621	2.82828	2.80451	1.6234	3.07743	1.16832	2.26722	1.50816	2.7691	2.09702	1.90534	1.8408	3.31158	1.14576	1.71999	3.84061	2.48224	2.96556	0.929067	2.5659	0.83096	0.0552172
not identified disaccharide	23.5		C12H22O11	disaccharide		0.55663	1.53207	0.683318	0	0.676329	1.05812	1.04997	0.629238	0.913044	0.825234	1.49405	0.570119	1.13507	2.52977	0.912716	0.505096	0.733821	0	1.93401	0	0	0	0	0	0	0	0	1.72596	0.9038	0	0	0	0	0	0	0.306293	2.07526	0.435435	2.23645	0	0	0
not identified disaccharide	26.27		C12H22O11	disaccharide		1.04499	0.932193	1.19687	1.5529	0.836059	1.55395	1.24928	0.894777	1.40886	1.15941	1.30362	1.09253	1.63007	1.89564	0.952518	1.31086	1.53796	1.48026	1.5037	2.57109	2.74519	1.38363	1.99315	1.39039	0.982606	1.03117	1.4208	0.931532	1.16034	2.26813	1.40073	2.27771	0	0.992312	1.39206	1.83078	1.97752	0.87071	0.446107	1.14167	0	0.962975
